# Supplementary material for: Long-term reliability of silicon wafer-based traditional backsheet modules and double glass modules
Source: Royal Society of Chemistry journal article supplement (doi:10.1039/c5ra11224a), 2015-01-01
Supplement: c5ra11224a1.pdf [file c5ra11224a1.pdf]

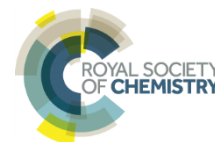

Journal Name

ARTICLE

**Electronic Supplementary Information for:**

**Long-term reliability on silicon wafer-based traditional backsheet modules and double glass photovoltaic modules**

Yingbin Zhang<sup>a,b</sup>, Jianmei Xu<sup>b</sup>, Jing Mao<sup>b</sup>, Jiahua Tao<sup>a</sup>, Hui Shen<sup>b</sup>, Yifeng Chen<sup>b</sup>, Zhiqiang Feng<sup>b</sup>, Pierre J. Verlinden<sup>b</sup>, Pingxiong Yang<sup>\*a</sup> and Junhao Chu<sup>a</sup>

<sup>a</sup>Key Laboratory of Polar Materials and Devices, Ministry of Education, Department of Electronic Engineering, East China Normal University, 500 Dongchuan Road, Shanghai 200241, China.

<sup>b</sup>State Key Laboratory of PV Science and Technology, Changzhou Trina Solar Energy Co., Ltd. 2 Tianhe Road, Electronics Park, New District, Changzhou, Jiangsu 213031, China.

<sup>a</sup>Corresponding author. Tel: +86 21 54345157; fax: +86 21 54345119. E-mail: [pxyang@ee.ecnu.edu.cn](mailto:pxyang@ee.ecnu.edu.cn) (P. Yang)

**Tables**

**Table S1** Electrical performance before and after TC stress for two different modules.

| Sample               | TC times | Average P <sub>max</sub> (W) | Average V <sub>oc</sub> (V) | Average I <sub>sc</sub> (A) | Average FF(%) |
|----------------------|----------|------------------------------|-----------------------------|-----------------------------|---------------|
| Double glass Modules | Initial  | 257.1                        | 37.71                       | 8.957                       | 76.1          |
| Traditional Modules  |          | 257.1                        | 37.69                       | 9.017                       | 75.6          |
| Double glass Modules | TC200    | 251.7                        | 37.47                       | 8.869                       | 75.8          |
| Traditional Modules  |          | 248.3                        | 37.34                       | 8.808                       | 75.5          |
| Double glass Modules | TC400    | 249.4                        | 37.43                       | 8.866                       | 75.5          |
| Traditional Modules  |          | 247.1                        | 37.39                       | 8.763                       | 75.5          |
| Double glass Modules | TC600    | 249.9                        | 37.41                       | 8.867                       | 75.4          |
| Traditional Modules  |          | 247.2                        | 37.43                       | 8.786                       | 75.2          |

**Table S2** Electrical performance before and after DH for two different modules.

| Sample               | DH times | Average $P_{\max}$ (W) | Average $V_{oc}$ (V) | Average $I_{sc}$ (A) | Average FF(%) |
|----------------------|----------|------------------------|----------------------|----------------------|---------------|
| Double glass Modules | Initial  | 256.8                  | 37.54                | 9.035                | 75.7          |
| Traditional Modules  |          | 257.5                  | 37.57                | 8.911                | 76.6          |
| Double glass Modules | DH1000   | 250.6                  | 37.54                | 8.861                | 75.3          |
| Traditional Modules  |          | 247.6                  | 37.53                | 8.588                | 76.2          |
| Double glass Modules | DH2000   | 249.3                  | 37.54                | 8.825                | 75.2          |
| Traditional Modules  |          | 243.7                  | 37.49                | 8.542                | 76.1          |
| Double glass Modules | DH3000   | 248.8                  | 37.49                | 8.786                | 75.5          |
| Traditional Modules  |          | 238.6                  | 37.49                | 8.506                | 74.8          |

**Table S3** Electrical performance change % after HF for two different modules.

| Sample               | HF times | Average $P_{\max}$ (W) | Average $V_{oc}$ (V) | Average $I_{sc}$ (A) | Average FF(%) |
|----------------------|----------|------------------------|----------------------|----------------------|---------------|
| Double glass Modules | Initial  | 250.4                  | 37.37                | 8.92                 | 75.1          |
| Traditional Modules  |          | 250.8                  | 37.45                | 8.95                 | 74.8          |
| Double glass Modules | HF10     | 249.0                  | 37.33                | 8.88                 | 75.1          |
| Traditional Modules  |          | 245.3                  | 37.3                 | 8.83                 | 74.5          |
| Double glass Modules | HF20     | 247.3                  | 37.29                | 8.85                 | 75.0          |
| Traditional Modules  |          | 239.2                  | 37.33                | 8.78                 | 73.0          |
| Double glass Modules | HF30     | 246.0                  | 37.22                | 8.80                 | 75.1          |
| Traditional Modules  |          | 232.2                  | 37.16                | 8.71                 | 71.7          |
| Double glass Modules | HF40     | 245.7                  | 37.23                | 8.78                 | 74.9          |
| Traditional Modules  |          | 203.0                  | 36.79                | 8.70                 | 63.4          |
| Double glass Modules | HF50     | 243.6                  | 37.20                | 8.76                 | 74.7          |
| Traditional Modules  |          | 166.2                  | 35.96                | 8.71                 | 53.0          |

**Table S4** Electrical performance after PID stress for two different modules

| Sample               | PID hours | Average $P_{\max}$ (W) | Average $V_{oc}$ (V) | Average $I_{sc}$ (A) | Average FF(%) |
|----------------------|-----------|------------------------|----------------------|----------------------|---------------|
| Double glass Modules | Initial   | 263.8                  | 38.0                 | 9.13                 | 76.0          |
| Traditional Modules  |           | 261.7                  | 38.0                 | 8.96                 | 77.0          |
| Double glass Modules | 192hrs    | 261.5                  | 38.0                 | 9.09                 | 75.7          |
| Traditional Modules  |           | 249.0                  | 37.9                 | 8.90                 | 73.8          |
| Double glass Modules | 288hrs    | 261.7                  | 38.0                 | 9.06                 | 75.9          |
| Traditional Modules  |           | 235.7                  | 37.7                 | 8.88                 | 70.4          |
| Double glass Modules | 384hrs    | 260.2                  | 38.0                 | 9.07                 | 75.6          |
| Traditional Modules  |           | 230.3                  | 37.7                 | 8.89                 | 68.8          |
| Double glass Modules | 480hrs    | 258.4                  | 37.9                 | 9.00                 | 75.7          |
| Traditional Modules  |           | 232.3                  | 37.7                 | 8.88                 | 69.4          |
| Double glass Modules | 600hrs    | 257.8                  | 38.0                 | 8.97                 | 75.7          |
| Traditional Modules  |           | 226.9                  | 37.7                 | 8.87                 | 67.9          |

**Table S5** Electrical performance after multiple sequential stress test for two different modules.

| Sample               | Multiple sequential stress | Average $P_{\max}$ (W) | Average $V_{oc}$ (V) | Average $I_{sc}$ (A) | Average FF(%) |
|----------------------|----------------------------|------------------------|----------------------|----------------------|---------------|
| Double glass Modules | Initial                    | 256.9                  | 37.56                | 9.048                | 75.6          |
| Traditional Modules  |                            | 257.4                  | 37.63                | 8.938                | 76.5          |
| Double glass Modules | DH2000                     | 250.6                  | 37.55                | 8.803                | 75.4          |
| Traditional Modules  |                            | 247.8                  | 37.52                | 8.702                | 75.9          |
| Double glass Modules | DH2000+TC600               | 247.1                  | 37.59                | 8.797                | 74.7          |
| Traditional Modules  |                            | 242.1                  | 37.53                | 8.658                | 74.5          |
| Double glass Modules | DH2000+                    | 244.2                  | 37.42                | 8.805                | 74.1          |
| Traditional Modules  | TC600+HF50                 | 57.5                   | 33.25                | 8.561                | 20.2          |
